# Supplementary material for: Possible neuroprotective effects of amide alkaloids from Bassia indica and Agathophora alopecuroides: in vitro and in silico investigations
Source: Royal Society of Chemistry journal article supplement (doi:10.1039/d2ra02275c), 2022-01-01
Supplement: d2ra02275c1.pdf [file d2ra02275c1.pdf]

## Supplementary information

### Possible neuroprotective effects of amide alkaloids from *Bassia indica* and *Agathophora alopecuroides* : *in vitro* and *in silico* investigations

Ahmed Othman<sup>a,b</sup>, Ahmed M. Sayed<sup>c,e</sup>, Yhiya Amen<sup>d</sup> and Kuniyoshi Shimizu<sup>a,\*</sup>

<sup>a</sup>Department of Agro-environmental Sciences, Graduate School of Bioresources and Bioenvironmental Sciences, Kyushu University, Fukuoka 819-0395, Japan.

<sup>b</sup>Department of Pharmacognosy, Faculty of Pharmacy, Al-Azhar University, Cairo 11371, Egypt

<sup>c</sup>Department of Pharmacognosy, Faculty of Pharmacy, Nahda University, Beni-Suef 62513, Egypt

<sup>d</sup>Department of Pharmacognosy, Faculty of Pharmacy, Mansoura University, Mansoura 35516, Egypt

<sup>e</sup>Department of Pharmacognosy, Faculty of Pharmacy, Almaaqaq University, Basra 61014, Iraq

#### Abstract

In Alzheimer's disease (AD), the accumulation of amyloid- $\beta$  plaques, overactivity of MAO-B, and phosphorylated tau protein in the central nervous system result in neuroinflammation and cognitive impairments. Therefore, the multi-targeting of these therapeutic targets has emerged as a promising strategy for the development of AD treatments. The current study reports the isolation and identification of seven amide alkaloids, namely, *N-trans*-feruloyl-3-methoxytyramine (**1**), *N-trans*-feruloyltyramine (**2**), *S*-(-)-*N-trans*-feruloylnormetanephrine (**3**), *S*-(-)-*N-trans*-feruloyloctopamine (**4**), *R*-(+)-*N-trans*-feruloyloctopamine (**5**), *N-trans*-caffeoyltyramine (**6**), and *S*-(-)-3-(4-hydroxy-3-methoxyphenyl)-*N*-[2-(4-hydroxyphenyl)-methoxyethyl]acrylamide (**7**), from *B. indica* and *A. alopecuroides*, which are halophytic plants that have been reported to contain diverse phytochemicals. Additionally, the study explores the potential inhibition effects of the isolates on  $\beta$ -secretase, monoamine oxidase enzymes, and phosphorylated tau protein, and their anti-aggregation effects on amyloid- $\beta$  fibrils. Compounds **1**, **2**, and **7** showed potent inhibitory activity against BACE1, MAO-B, and phosphorylated tau protein, as well as anti-aggregation activity against A $\beta$ -peptides. Additionally, compound **6** displayed a promising inhibition activity against MAO-B enzyme. Further in-depth *in silico* and modeling analyses (*i.e.*, docking, absolute binding free energy calculations, and molecular dynamics simulations) were carried out to reveal the binding mode of each active compound inside the corresponding enzyme (*i.e.*, MAO-B and BACE1). The results indicate that *B. indica*, *A. alopecuroides*, and the isolated amide alkaloids might be useful in the development of lead compounds for the prevention of neurodegenerative diseases, especially AD.

## Table of content

|                                                                     |    |
|---------------------------------------------------------------------|----|
| Figure S1: HR-MS of compound 1                                      | 3  |
| Figure S2: $^1\text{H}$ -NMR of compound 1                          | 3  |
| Figure S3: $^{13}\text{C}$ -NMR spectrum of compound 1              | 4  |
| Figure S4: HSQC-NMR spectrum of compound 1                          | 4  |
| Figure S5: HMBC spectrum of compound 1                              | 5  |
| Figure S6: $^1\text{H}$ - $^1\text{H}$ COSY spectrum of compound 1  | 5  |
| Figure S7: HR-MS of compound 2                                      | 6  |
| Figure S8: $^1\text{H}$ -NMR spectrum of compound 2                 | 6  |
| Figure S9: $^{13}\text{C}$ -NMR spectrum of compound 2              | 7  |
| Figure S10: HSQC-NMR spectrum of compound 2                         | 7  |
| Figure S11: HMBC-NMR spectrum of compound 2                         | 8  |
| Figure S12: HR-MS spectrum of compound 3                            | 8  |
| Figure S13: $^1\text{H}$ -NMR spectrum of compound 3                | 9  |
| Figure S14: $^{13}\text{C}$ -NMR spectrum of compound 3             | 9  |
| Figure S15: HR-MS spectrum of compound 4                            | 10 |
| Figure S16: $^1\text{H}$ -NMR of compound 4                         | 10 |
| Figure S17: $^{13}\text{C}$ -NMR spectrum of compound 4             | 11 |
| Figure S18: HSQC spectrum of compound 4                             | 11 |
| Figure S19: HMBC spectrum of compound 4                             | 12 |
| Figure S20: $^1\text{H}$ - $^1\text{H}$ COSY spectrum of compound 4 | 12 |
| Figure S21: HR-MS of compound 5                                     | 13 |
| Figure S22: $^1\text{H}$ -NMR spectrum of compound 5                | 13 |
| Figure S23: $^{13}\text{C}$ -NMR spectrum of compound 5             | 14 |
| Figure S24: HR-MS of compound 6                                     | 14 |
| Figure S25: $^1\text{H}$ -NMR spectrum of compound 6                | 15 |
| Figure S26: APT-NMR spectrum of compound 6                          | 15 |
| Figure S27: HR-MS spectrum of compound 7                            | 16 |
| Figure S28: $^1\text{H}$ -NMR spectrum of compound 7                | 16 |
| Figure S29: APT-NMR spectrum of compound 7                          | 17 |
| Figure S30: FT-IR spectrum of compounds 2, 4, 6, and 7              | 18 |

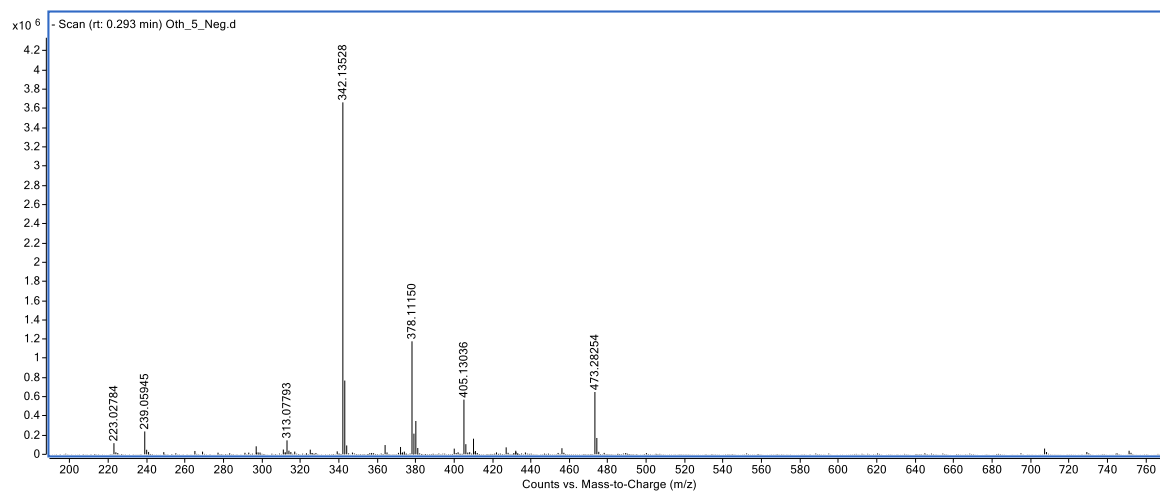

Figure S1: HR-MS of compound 1

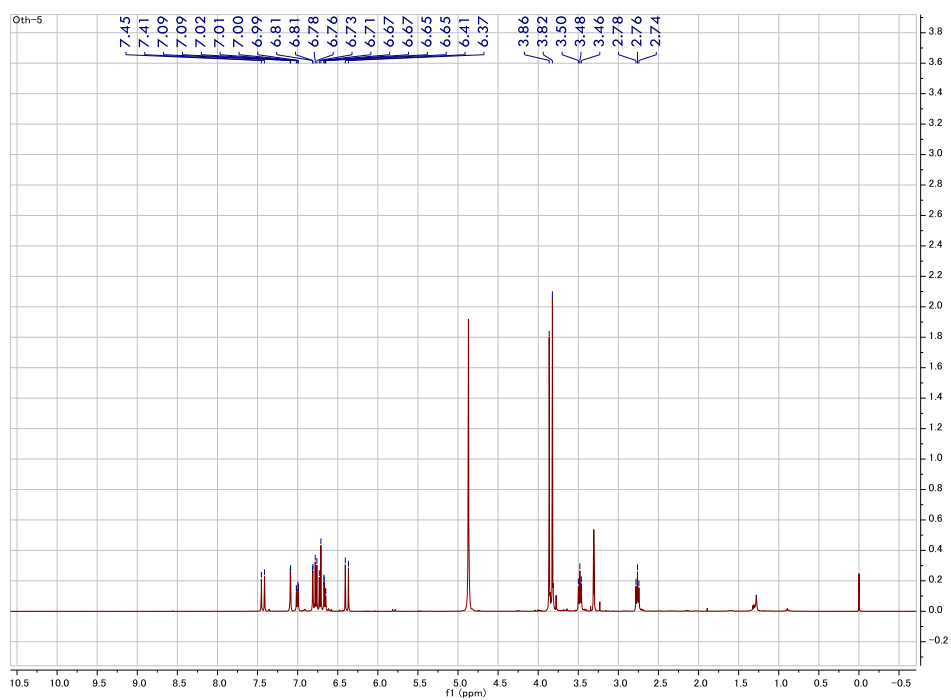

Figure S2:  $^1\text{H-NMR}$  of compound 1

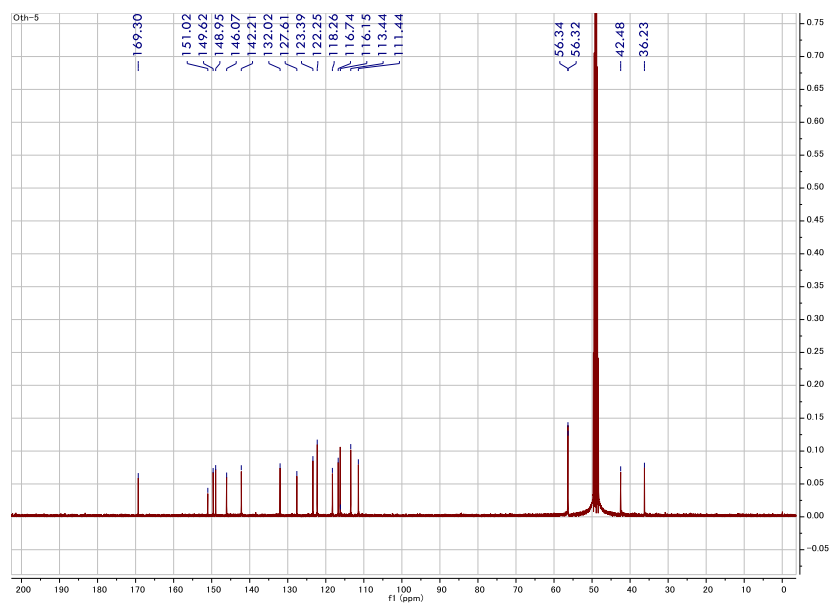

Figure S3:  $^{13}\text{C}$ -NMR spectrum of compound 1

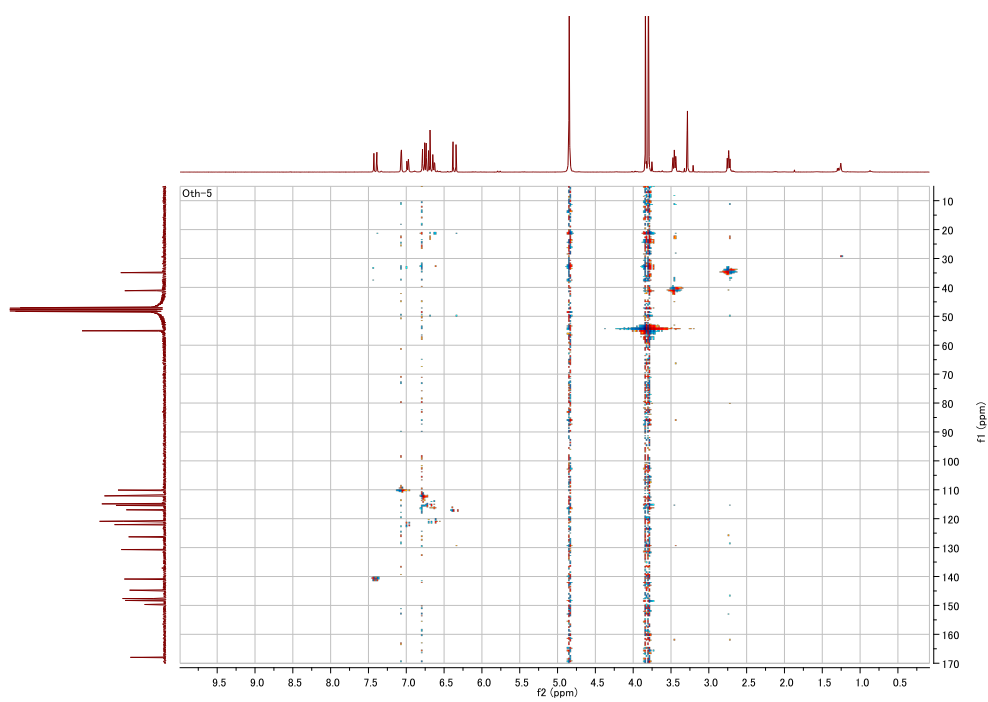

Figure S4: HSQC-NMR spectrum of compound 1

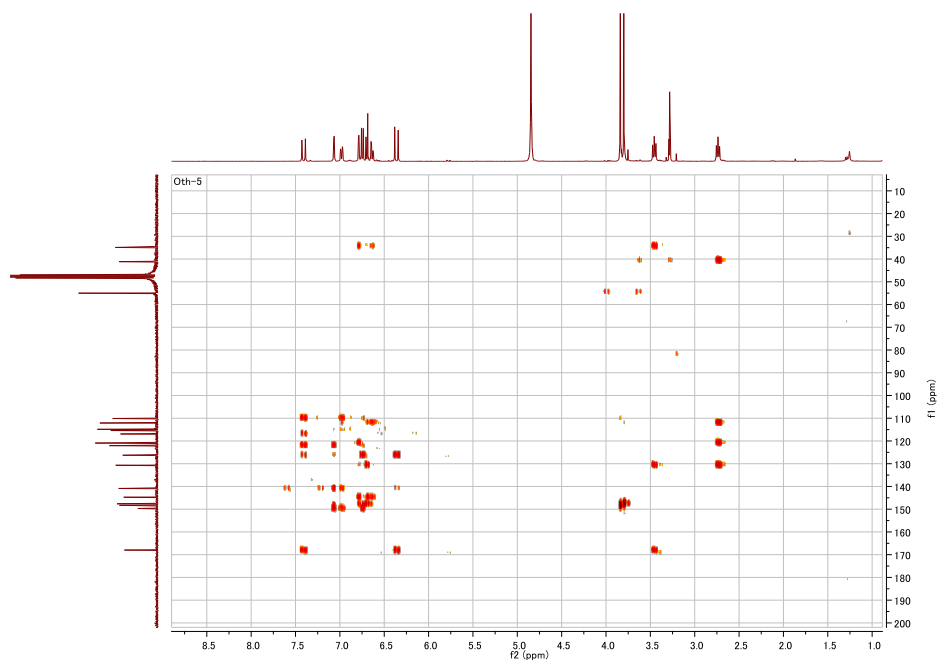

Figure S5: HMBC spectrum of compound 1

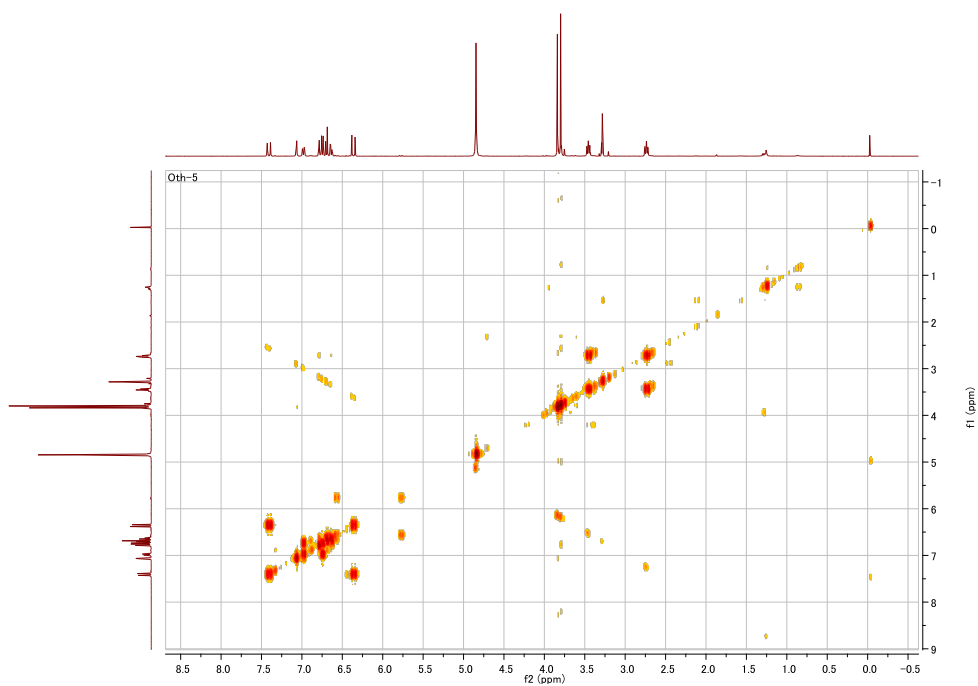

Figure S6:  $^1\text{H}$ - $^1\text{H}$  COSY spectrum of compound 1

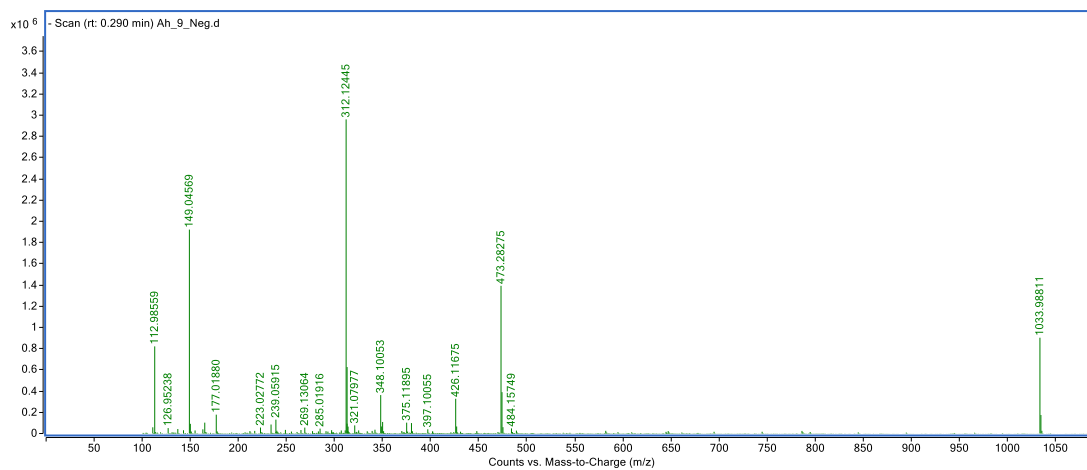

Figure S7: HR-MS of compound 2

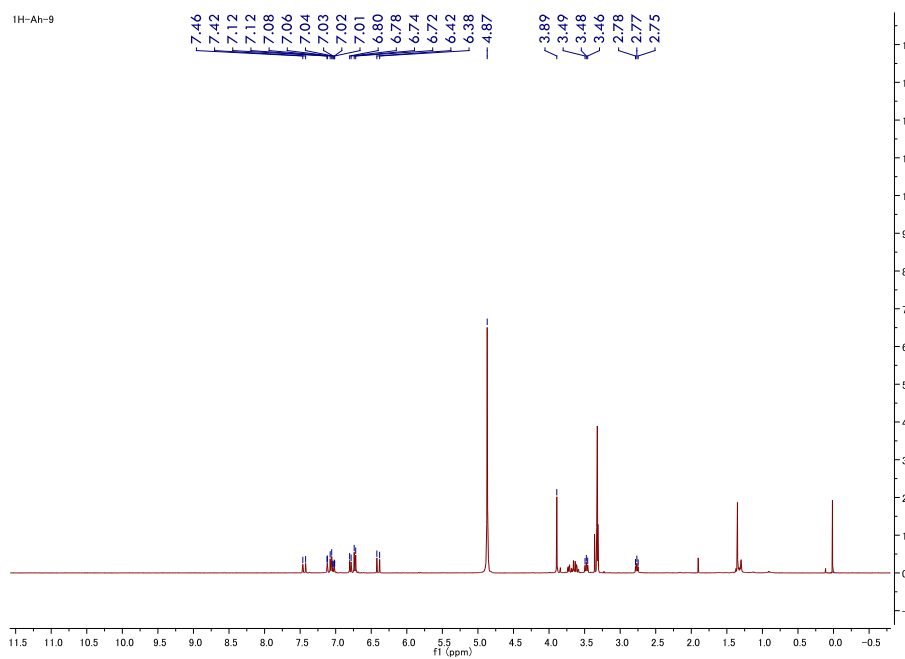

Figure S8: <sup>1</sup>H-NMR spectrum of compound 2

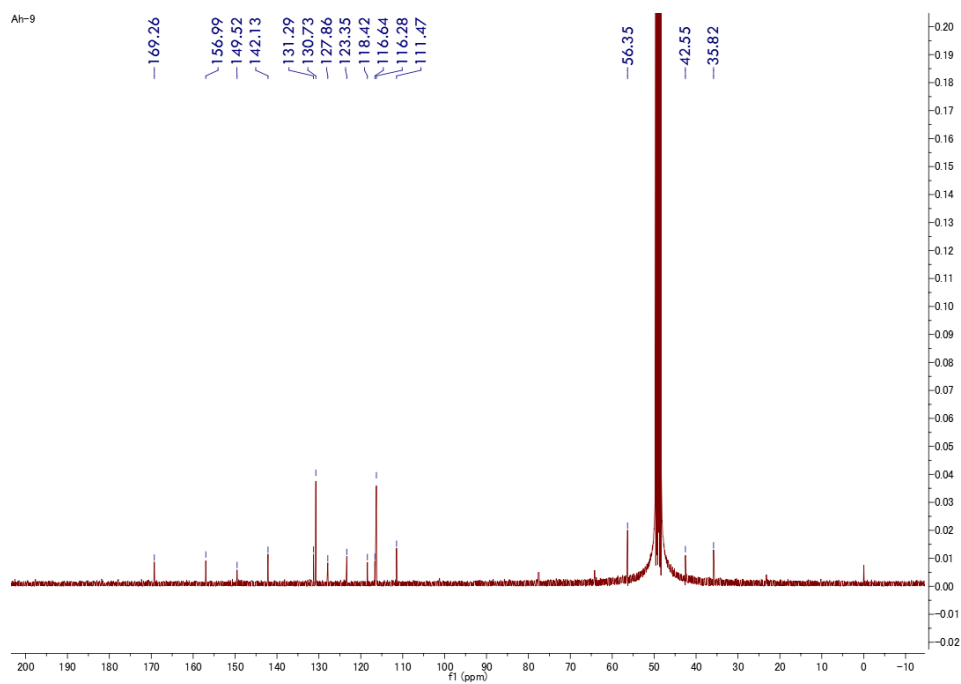

Figure S9:  $^{13}\text{C}$ -NMR spectrum of compound 2

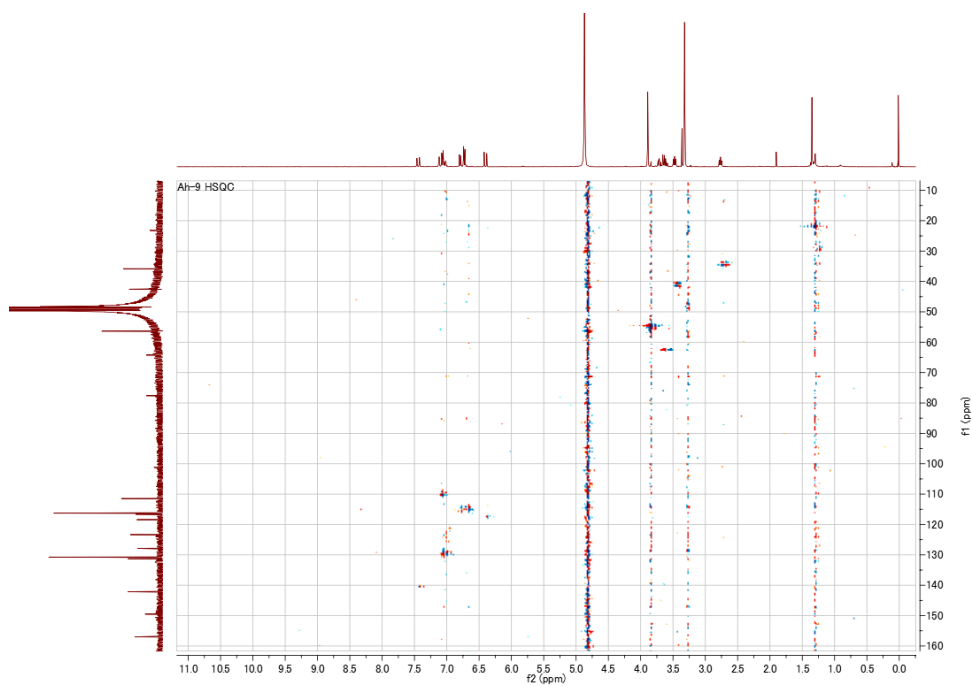

Figure S10: HSQC-NMR spectrum of compound 2

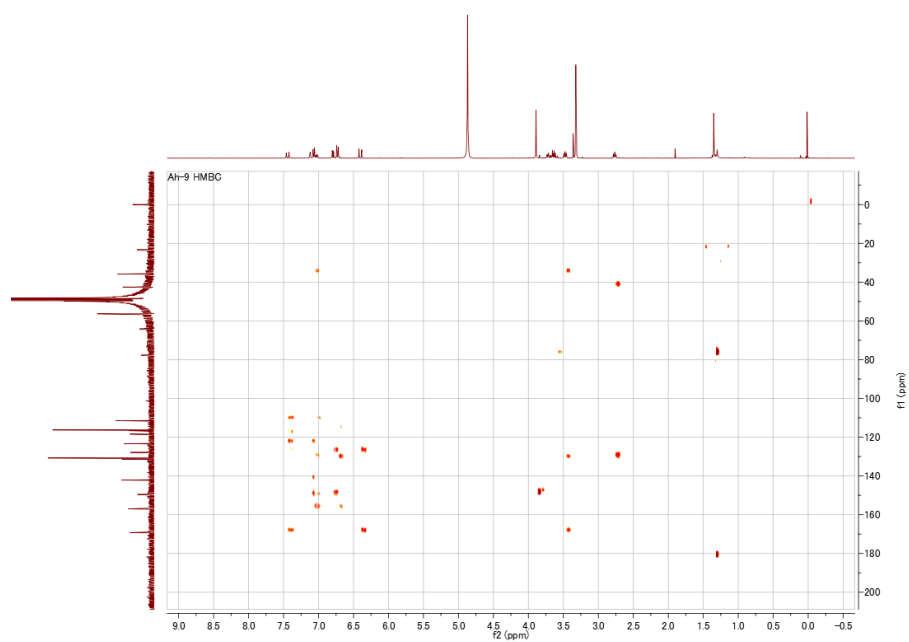

Figure S11: HMBC-NMR spectrum of compound 2

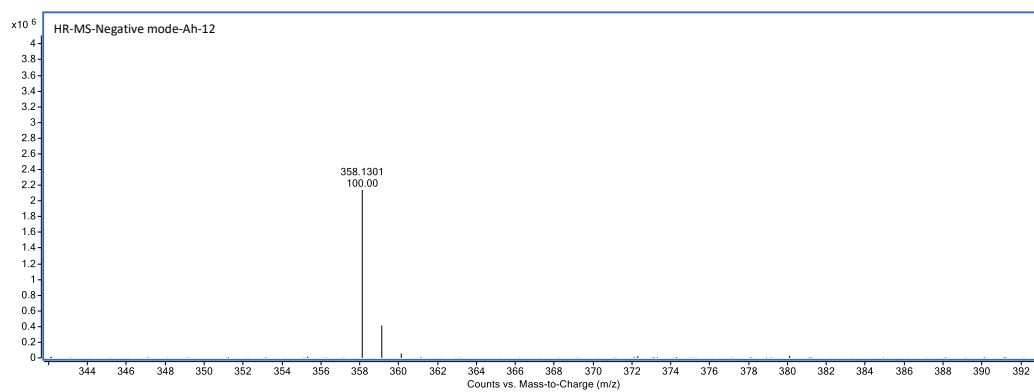

Figure S12: HR-MS spectrum of compound 3



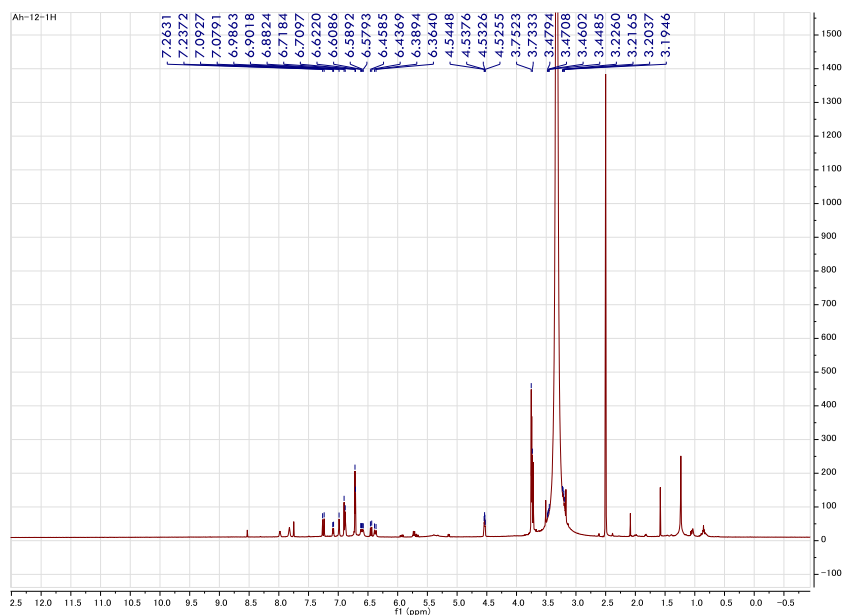

Figure S13: <sup>1</sup>H-NMR spectrum of compound 3

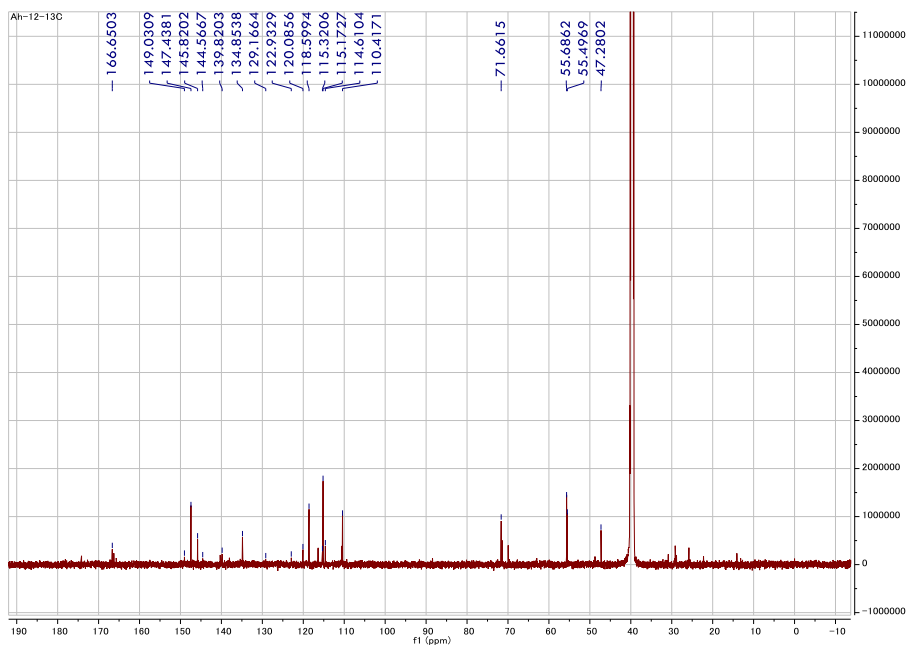

Figure S14: <sup>13</sup>C-NMR spectrum of compound 3

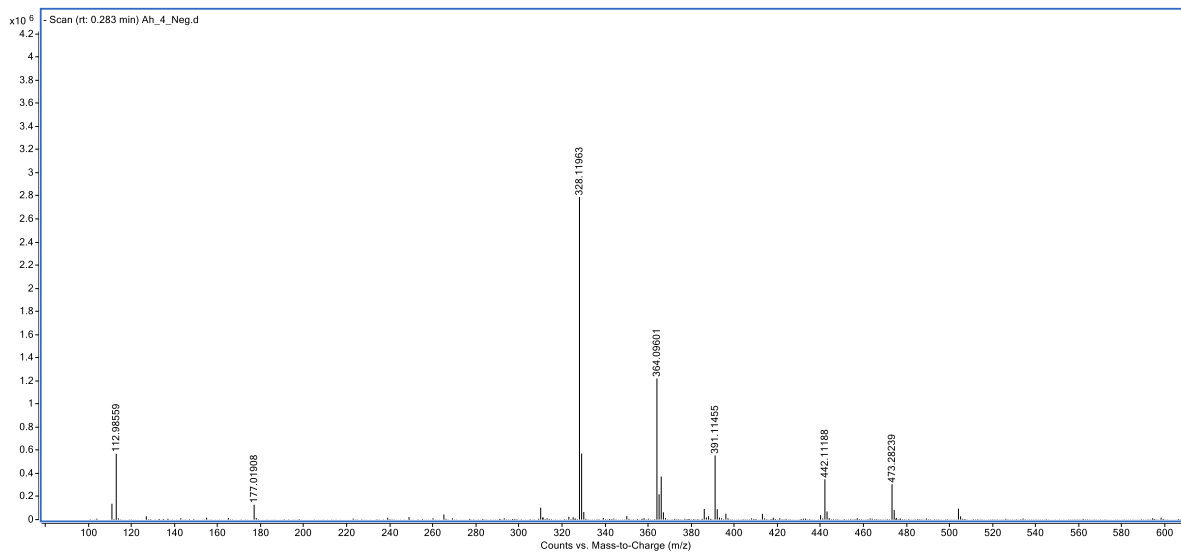

Figure S15: HR-MS spectrum of compound 4

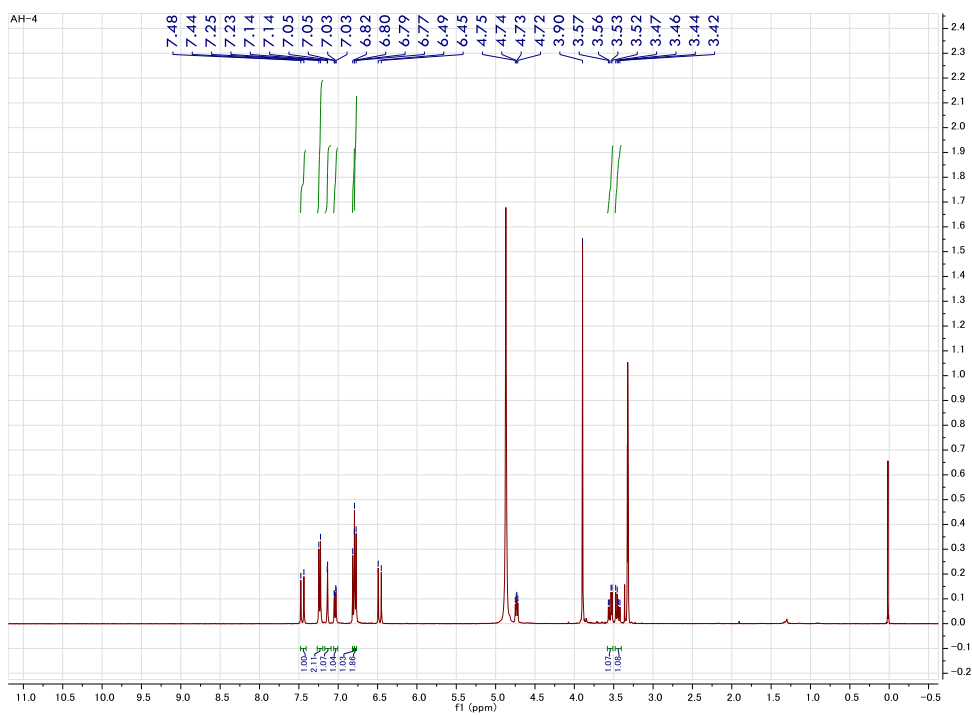

Figure S16: <sup>1</sup>H-NMR of compound 4

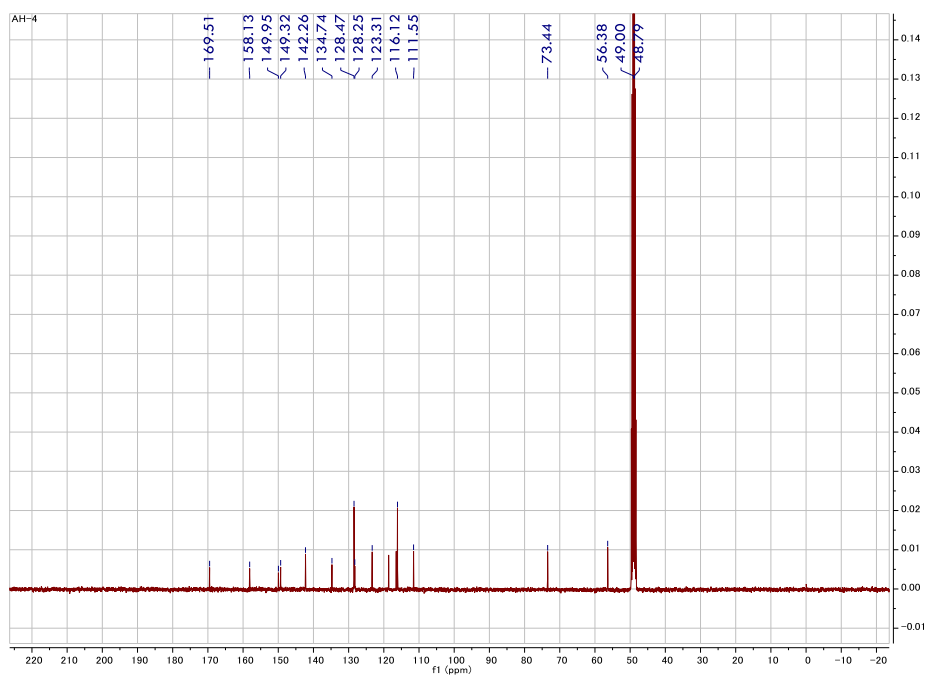

Figure S17:  $^{13}\text{C}$ -NMR spectrum of compound 4

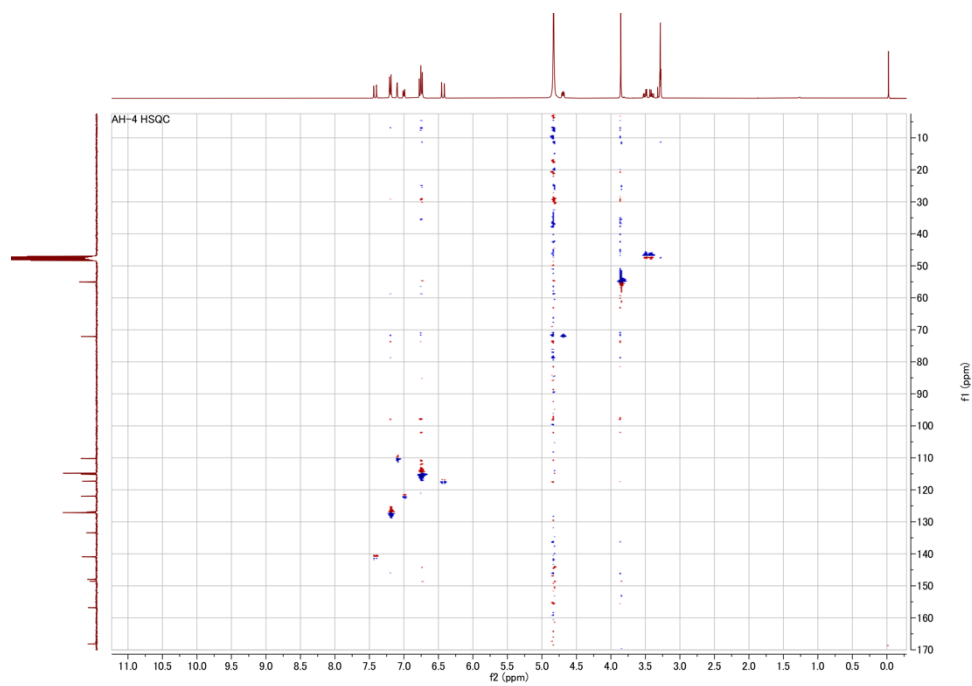

Figure S18: HSQC spectrum of compound 4

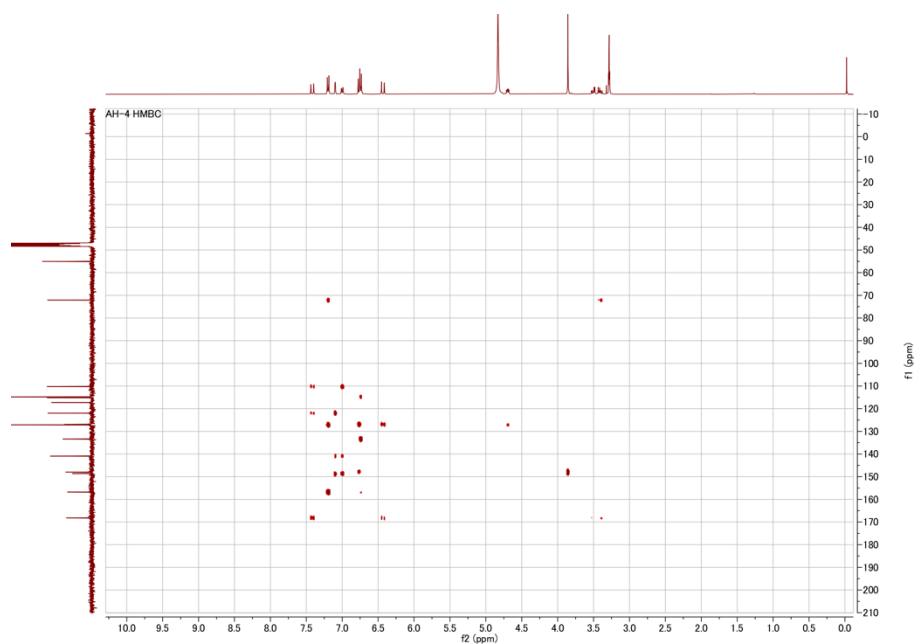

Figure S19: HMBC spectrum of compound 4

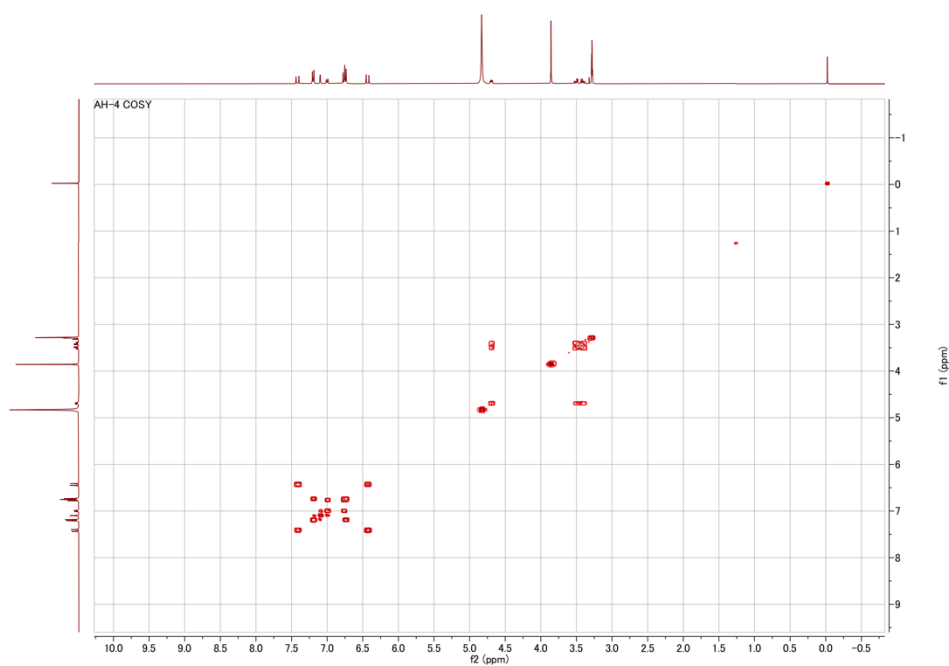

Figure S20: <sup>1</sup>H-<sup>1</sup>H COSY spectrum of compound 4

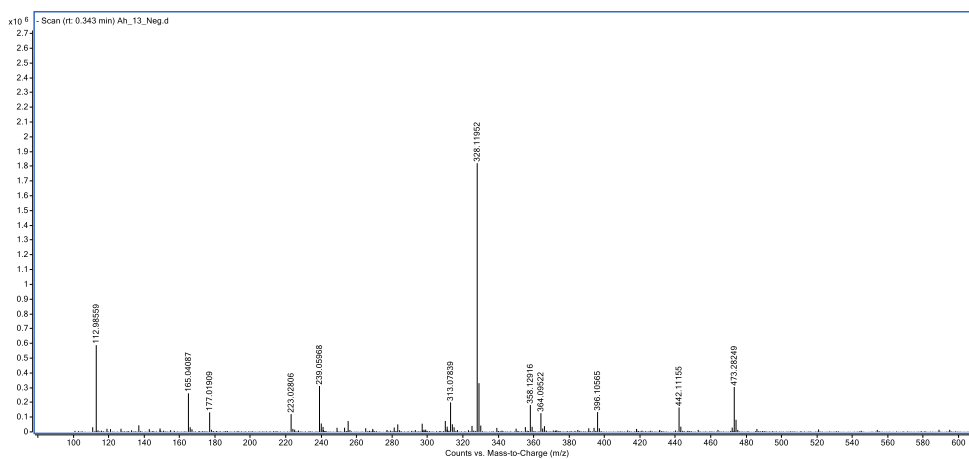

Figure S21: HR-MS of compound 5

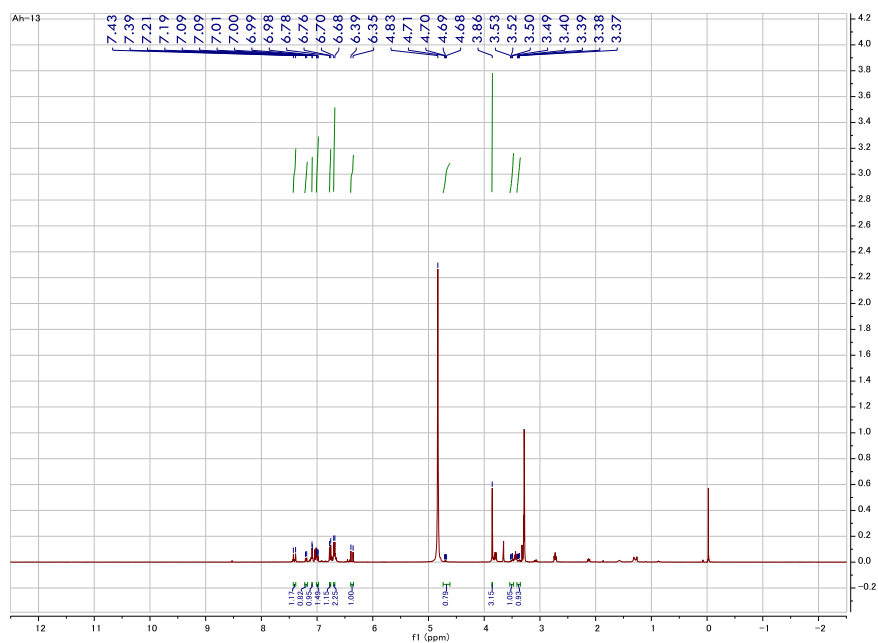

Figure S22: <sup>1</sup>H-NMR spectrum of compound 5

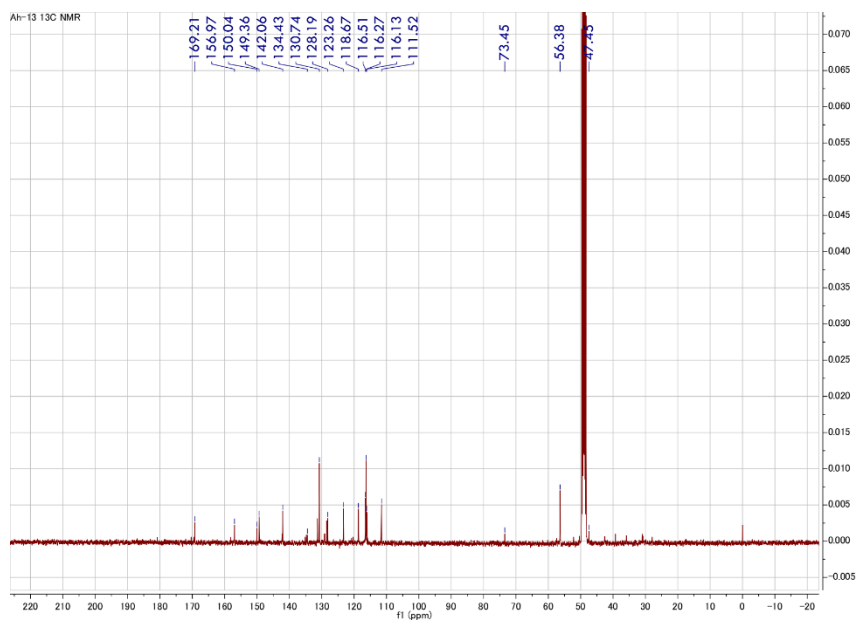

Figure S23: <sup>13</sup>C-NMR spectrum of compound 5

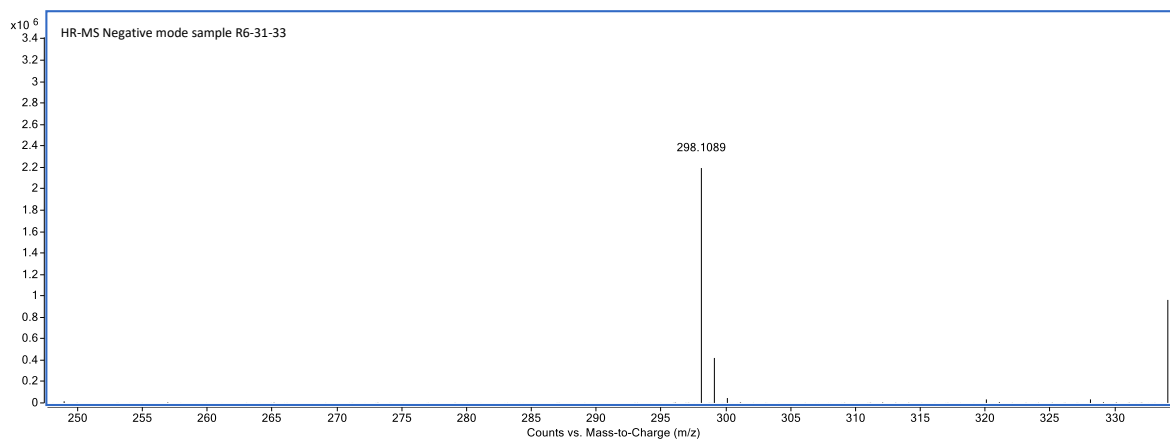

Figure S24: HR-MS of compound 6

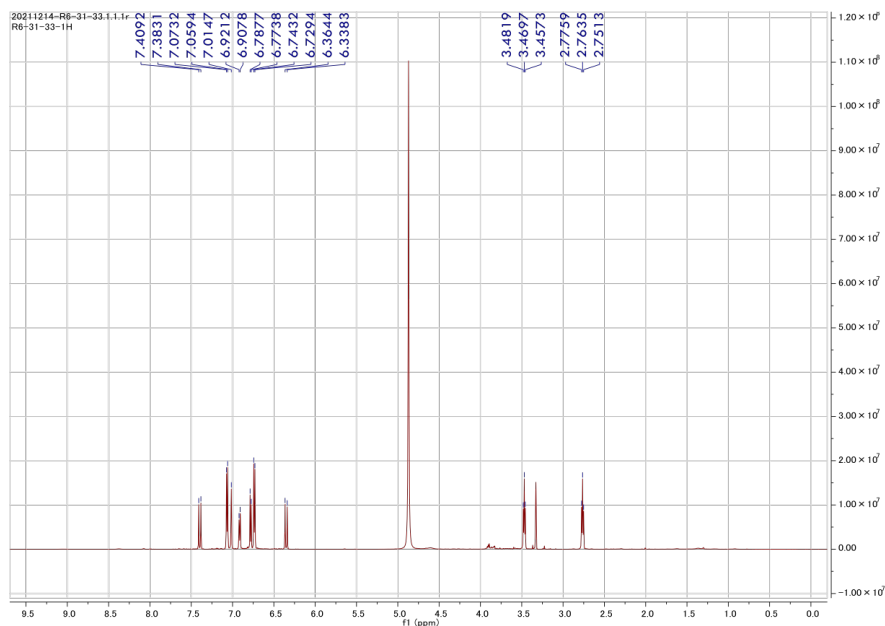

Figure S25:  $^1\text{H-NMR}$  spectrum of compound 6

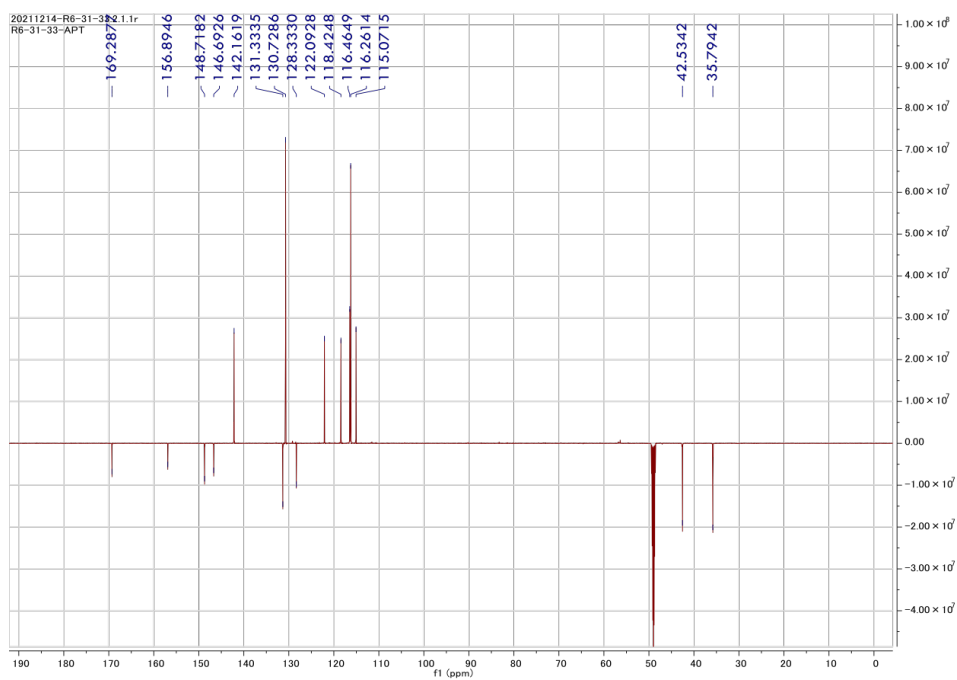

Figure S26: APT-NMR spectrum of compound 6

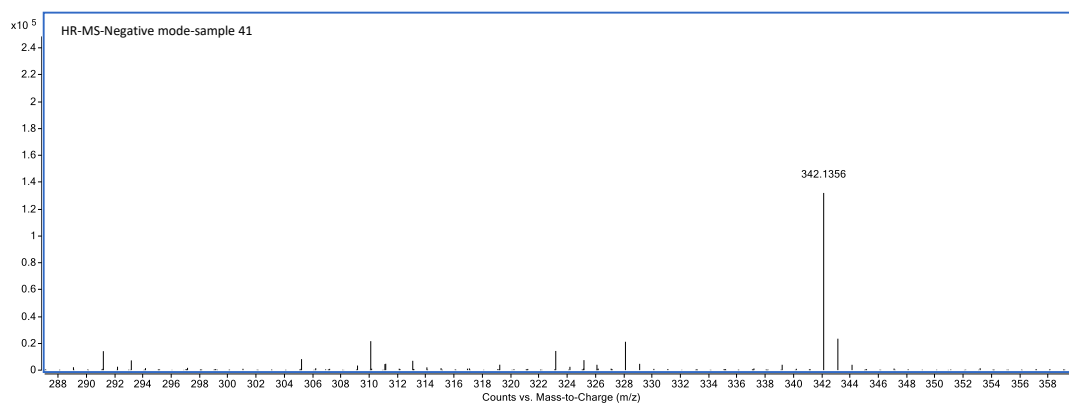

Figure S27: HR-MS spectrum of compound 7

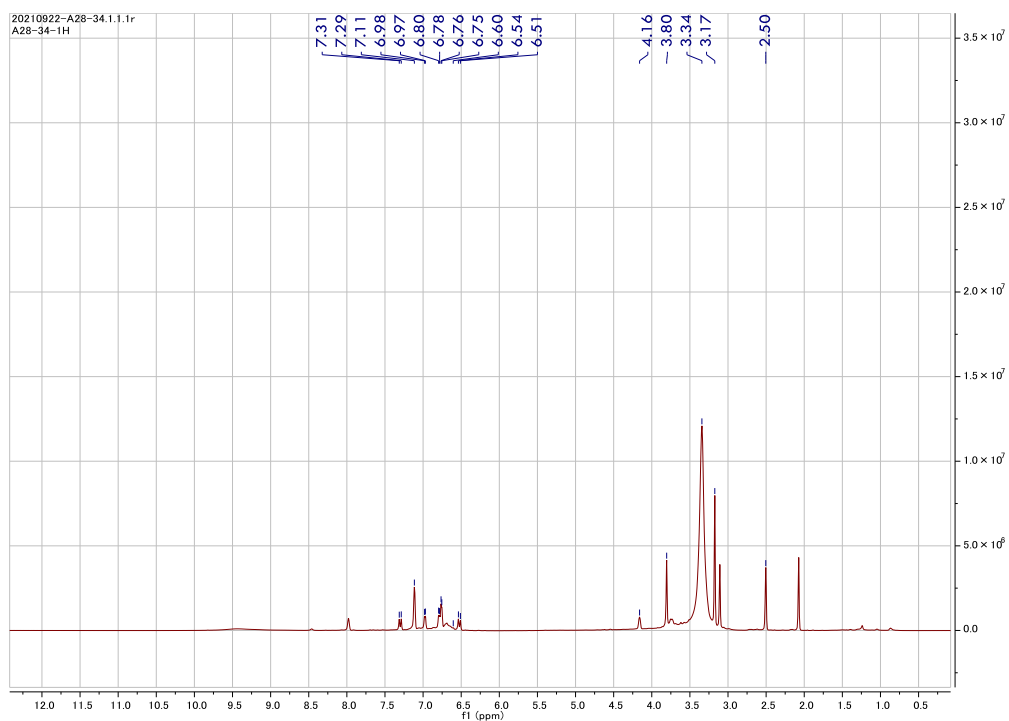

Figure S28: <sup>1</sup>H-NMR spectrum of compound 7



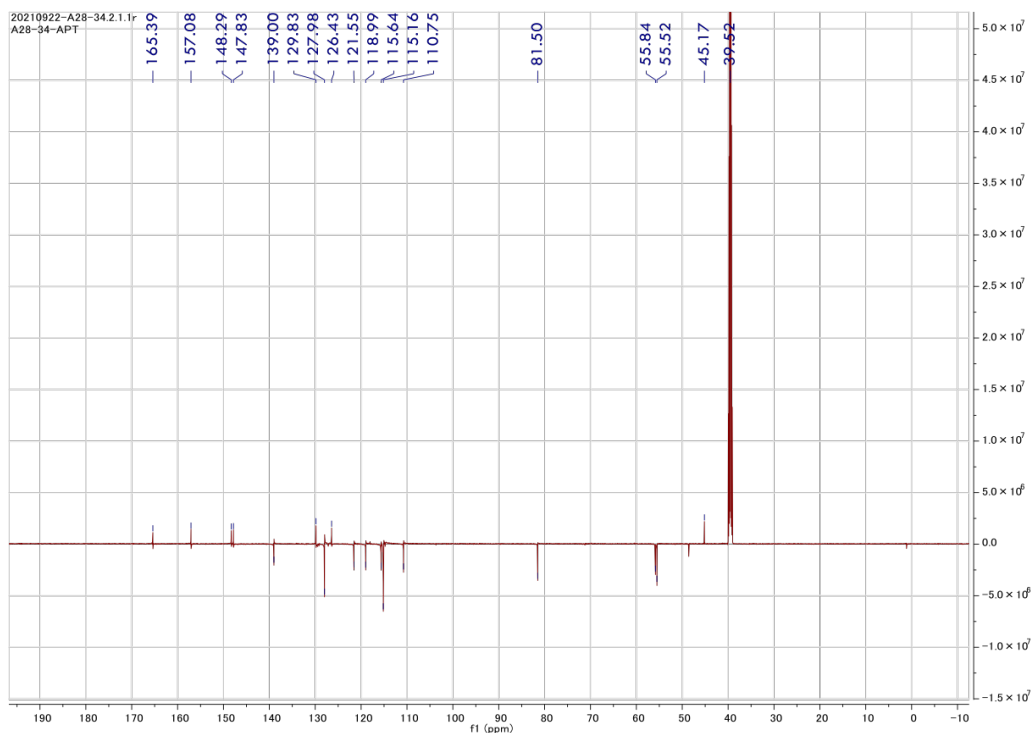

Figure S29: APT-NMR spectrum of compound 7

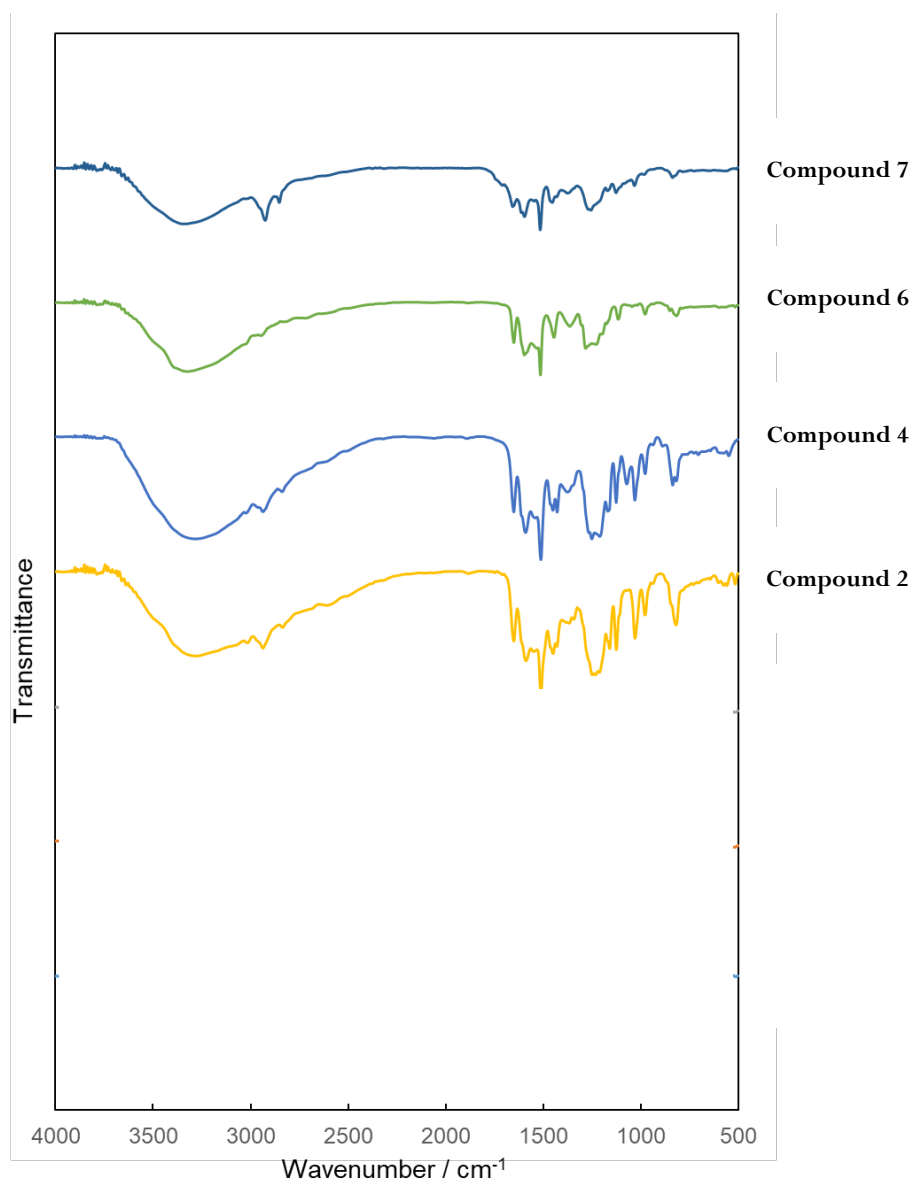

Figure S30: FT-IR spectrum of compounds 2, 4, 6, and 7
